# Supplementary material for: The influence of cage size on the reactivity of trimetallic nitride metallofullerenes: a mono- and bis-methanoadduct of Gd3N@C80 and a monoadduct of Gd3N@C84
Source: Royal Society of Chemistry journal article supplement (doi:10.1039/b804847a), 2008-01-01
Supplement: b804847a.pdf [file b804847a.pdf]

## The Influence of the Cage Size on the Reactivity of Trimetallic Nitride Metallofullerenes: A Mono and Bisadduct of $Gd_3N@C_{80}$ and A Monoadduct of $Gd_3N@C_{84}$

Manuel N. Chaur<sup>a</sup>, Frederic Melin<sup>a</sup>, Andreas J. Athans<sup>a</sup>, Bevan Elliott<sup>a</sup>, Kenneth Walker<sup>b</sup>,  
Brian C. Holloway<sup>b</sup> and Luis Echegoyen<sup>a\*</sup>

*Contribution from the Department of Chemistry, Clemson University, Clemson, South Carolina 29634,  
and Luna Innovations, Inc. (NanoWorks division), 521 Bridge street, Danville, Virginia 24541*

### SUPPORTING INFORMATION

#### I. Simulated and experimental mass spectra of isolated monoadduct $Gd_3N@C_{80}-C(CO_2Et)_2$

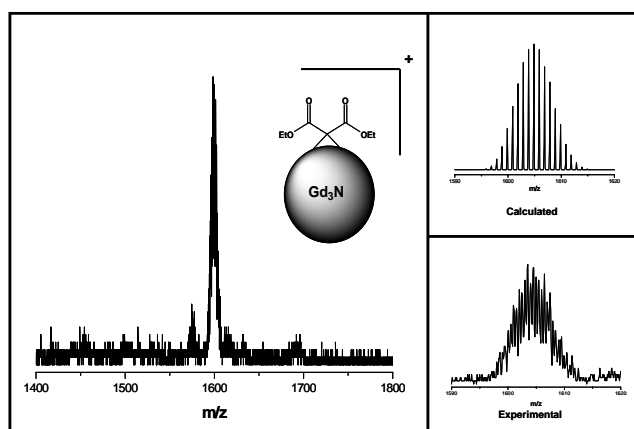

#### II. Simulated and experimental mass spectra of isolated bisadduct $Gd_3N@C_{80}-[C(CO_2Et)_2]_2$

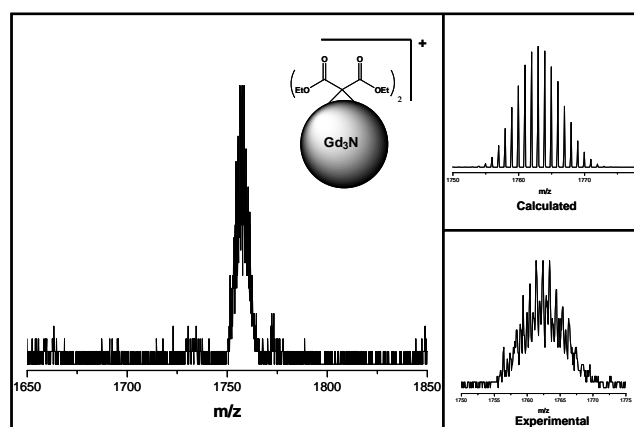

### III. Simulated and experimental mass spectra of isolated monoadduct $\text{Gd}_3\text{N@C}_{84}\text{-C}(\text{CO}_2\text{Et})_2$

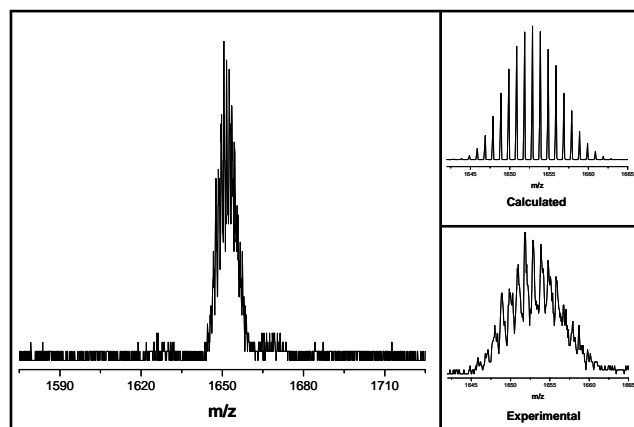

### IV. UV-vis-NIR spectra of pure $\text{Gd}_3\text{N@C}_{80}$ ( $I_h$ ), monoadduct $\text{Gd}_3\text{N@C}_{80}\text{-C}(\text{CO}_2\text{Et})_2$ , and bisadduct $\text{Gd}_3\text{N@C}_{80}\text{-[C}(\text{CO}_2\text{Et})_2\text{]}_2$ .

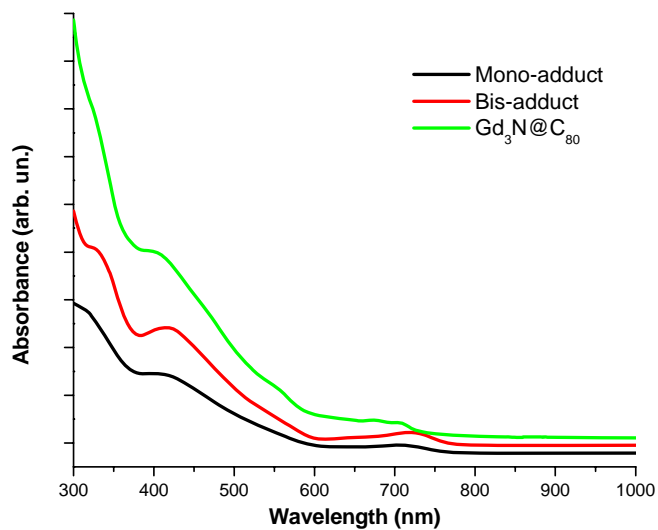

V. Two stage HPLC chromatogram of bisadduct  $\text{Gd}_3\text{N}@C_{80}\text{-(C(CO}_2\text{Et)}_2)_2$ . Eluent: Toluene; Flow rate: 2.0 mL/min; Buckyrep and Buckyrep-M columns; Detection: 372 nm.

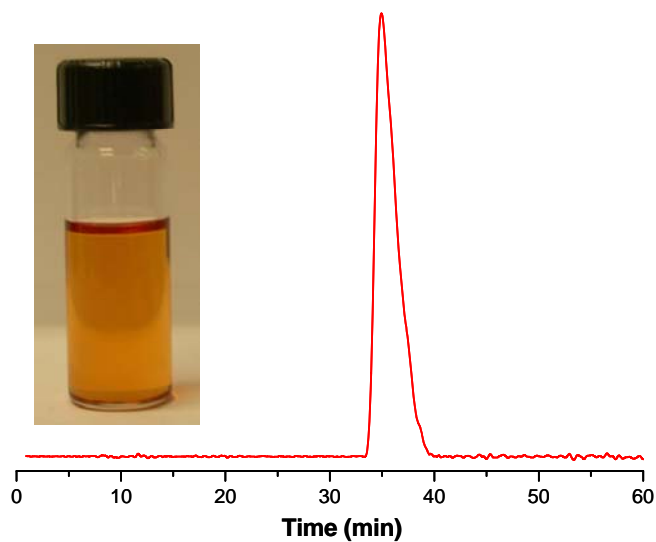

VI. UV-vis-NIR spectra of pure  $\text{Gd}_3\text{N}@C_{84}$  and monoadduct  $\text{Gd}_3\text{N}@C_{84}\text{-(C(CO}_2\text{Et)}_2)$ .

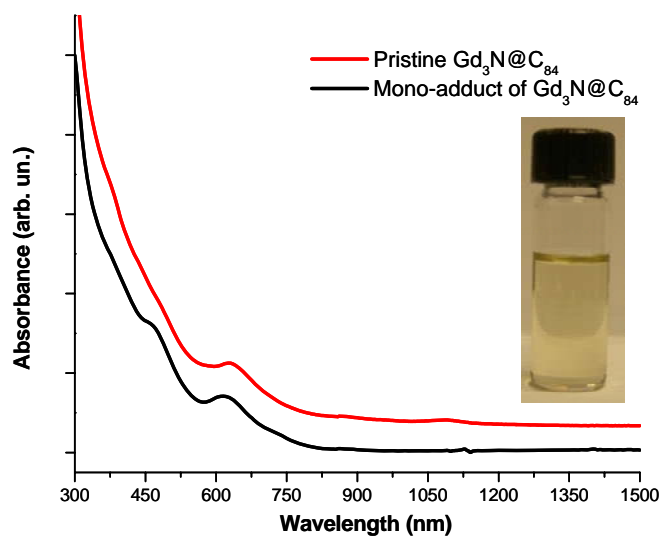

VII. Relevant redox potentials for pristine  $\text{Gd}_3\text{N@C}_{80}$  and  $\text{Gd}_3\text{N@C}_{84}$  and their methano derivatives (V vs  $\text{Fc}^+/\text{Fc}$ ).

| compound                                                                | $E_{1/2 \text{ OX1}}$ | $E_{\text{pc red1}}$ | $E_{\text{pc red2}}$ | $E_{\text{pc red3}}$ |
|-------------------------------------------------------------------------|-----------------------|----------------------|----------------------|----------------------|
| $\text{Gd}_3\text{N@C}_{80}$                                            | +0.58                 | -1.44                | -1.86                | -2.18                |
| $\text{Gd}_3\text{N@C}_{80}$ -<br>[C(COOEt) <sub>2</sub> ]              | +0.58                 | -1.39                | -1.83                | -2.17                |
| $\text{Gd}_3\text{N@C}_{80}$ -<br>[C(COOEt) <sub>2</sub> ] <sub>2</sub> | +0.59                 | -1.40                | -1.88                |                      |
| $\text{Gd}_3\text{N@C}_{84}$                                            | 0.32                  | -1.37                | -1.76                |                      |
| $\text{Gd}_3\text{N@C}_{84}$ -<br>[C(COOEt) <sub>2</sub> ]              | 0.28                  | -1.43                | -1.77                | -2.38                |
